# Supplementary material for: Integrated microRNA and mRNA Expression Profiling Identifies Novel Targets and Networks Associated with Ebstein’s Anomaly
Source: MDPI journal article supplement (doi:10.3390/cells10051066), 2021-04-30
Supplement: s1 [file s1]

**SUPPLEMENTARY TABLE 1:** Clinical Characteristics of included Ebstein's anomaly patients

| Parameters                                                                           | Ebstein's Anomaly<br>(n = 16) |
|--------------------------------------------------------------------------------------|-------------------------------|
| Age ( Years)                                                                         | 25.8 ± 12.4                   |
| Weight (kg)                                                                          | 63.7 ± 14.00                  |
| Lenght (cm)                                                                          | 165 ± 8.12                    |
| Body Mass Index ( BMI, kg/m <sup>2</sup> )                                           | 1.63 ± 0.28                   |
| Systolic Blood Pressure (SBP, mmHg)                                                  | 120 ± 9.69                    |
| Diastolic Blood Pressure (DBP, mmHg)                                                 | 67.4 ± 9.32                   |
| Heart Rate (bpm)                                                                     | 71.9 ± 10.80                  |
| <b>Severity of Ebstein's anomaly based on Carpentier criteria</b>                    |                               |
| • Mild                                                                               | 5/16 (31.25 %)                |
| • Moderate                                                                           | 9/16 (56.25 %)                |
| • Sever                                                                              | 2/16 12.50 %)                 |
| <b>New York Heart Association (NYHA)</b>                                             |                               |
| • NYHA Class I                                                                       | 8/16 (50.0 %)                 |
| • NYHA Class II                                                                      | 3/16 (18.75 %)                |
| • NYHA Class III                                                                     | 5/16 (31.25 %)                |
| <b>Other parameters</b>                                                              |                               |
| Familial Ebstein's anomaly                                                           | 4/16 (25.0 %)                 |
| Compaction cardiomyopathy of the left ventricle                                      | 8/16 (50.0 %)                 |
| Supraventricular arrhythmias                                                         | 7/16 (43.75 %)                |
| Atrial septal defect (ASD)                                                           | 7/16 (43.75 %)                |
| Reconstructive surgery for the tricuspid valve                                       | 1/16 (6.25 %)                 |
| <ul style="list-style-type: none"> <li>Mean ± standard deviation was used</li> </ul> |                               |

**SUPPLEMENTARY TABLE 2:** Significantly abundant miRNAs in the blood of patients with Ebstein's anomaly compared to healthy controls as determined by microarray.

| MicroRNA        | Median<br>Ebstein's anomaly | Median<br>Controls | Fold<br>change | Regulation | P-value  | Adjusted<br>P-value | AUC  |
|-----------------|-----------------------------|--------------------|----------------|------------|----------|---------------------|------|
| hsa-miR-186-5p  | 4.47                        | 6.92               | 0.17           | Lower      | 2.00E-11 | 3.63E-09            | 0.01 |
| hsa-miR-199a-5p | 3.87                        | 6.09               | 0.19           | Lower      | 4.23E-09 | 1.02E-07            | 0.01 |
| hsa-miR-142-3p  | 6.29                        | 8.09               | 0.23           | Lower      | 5.14E-06 | 2.53E-05            | 0.05 |
| hsa-miR-148b-3p | 2.85                        | 4.59               | 0.24           | Lower      | 4.28E-09 | 1.02E-07            | 0.01 |
| hsa-miR-215-5p  | 6.38                        | 8.19               | 0.24           | Lower      | 2.66E-05 | 0.00011             | 0.03 |
| hsa-miR-340-3p  | 3.64                        | 5.36               | 0.25           | Lower      | 6.15E-07 | 4.68E-06            | 0.02 |
| hsa-miR-128-3p  | 5.03                        | 6.73               | 0.25           | Lower      | 3.19E-06 | 1.73E-05            | 0.01 |

|                 |      |       |      |       |          |          |      |
|-----------------|------|-------|------|-------|----------|----------|------|
| hsa-miR-15b-3p  | 1.66 | 3.56  | 0.25 | Lower | 7.87E-09 | 1.58E-07 | 0.01 |
| hsa-miR-145-5p  | 2.77 | 4.75  | 0.27 | Lower | 4.04E-10 | 1.76E-08 | 0.01 |
| hsa-miR-505-3p  | 2.55 | 4.16  | 0.27 | Lower | 2.16E-10 | 1.19E-08 | 0.01 |
| hsa-miR-23b-3p  | 4.86 | 6.28  | 0.29 | Lower | 4.16E-06 | 2.13E-05 | 0.01 |
| hsa-miR-942-5p  | 2.42 | 4.05  | 0.30 | Lower | 1.14E-08 | 2.12E-07 | 0.01 |
| hsa-miR-365a-3p | 3.31 | 4.93  | 0.30 | Lower | 2.28E-10 | 1.19E-08 | 0.01 |
| hsa-miR-7-1-3p  | 1.80 | 3.56  | 0.31 | Lower | 1.65E-10 | 1.19E-08 | 0.01 |
| hsa-miR-30b-5p  | 9.94 | 11.47 | 0.31 | Lower | 1.47E-06 | 8.90E-06 | 0.01 |
| hsa-miR-23a-3p  | 7.73 | 9.17  | 0.31 | Lower | 4.76E-07 | 3.88E-06 | 0.01 |
| hsa-miR-125b-5p | 3.65 | 6.01  | 0.31 | Lower | 0.00082  | 0.00201  | 0.17 |
| hsa-miR-182-5p  | 2.69 | 4.48  | 0.32 | Lower | 2.92E-06 | 1.62E-05 | 0.04 |
| hsa-miR-29c-5p  | 4.50 | 6.11  | 0.33 | Lower | 6.20E-05 | 0.00023  | 0.10 |
| hsa-miR-361-3p  | 5.36 | 6.78  | 0.34 | Lower | 5.77E-06 | 2.74E-05 | 0.02 |
| hsa-miR-4732-3p | 3.65 | 4.91  | 0.34 | Lower | 4.25E-07 | 3.58E-06 | 0.01 |
| hsa-miR-454-5p  | 1.72 | 3.33  | 0.35 | Lower | 6.24E-09 | 1.36E-07 | 0.00 |
| hsa-miR-30a-5p  | 3.03 | 4.83  | 0.35 | Lower | 0.00011  | 0.00036  | 0.11 |
| hsa-miR-378a-5p | 3.86 | 5.04  | 0.36 | Lower | 7.09E-06 | 3.30E-05 | 0.03 |
| hsa-miR-30e-3p  | 2.68 | 4.20  | 0.37 | Lower | 4.77E-05 | 0.00019  | 0.09 |
| hsa-miR-26a-5p  | 6.84 | 7.96  | 0.37 | Lower | 0.00106  | 0.00244  | 0.13 |
| hsa-miR-99b-5p  | 2.24 | 3.68  | 0.37 | Lower | 4.20E-07 | 3.58E-06 | 0.03 |
| hsa-miR-5189-3p | 1.90 | 3.10  | 0.38 | Lower | 0.00028  | 0.00076  | 0.13 |
| hsa-miR-326     | 2.90 | 4.48  | 0.40 | Lower | 4.72E-06 | 2.37E-05 | 0.05 |
| hsa-miR-664a-3p | 3.87 | 5.11  | 0.40 | Lower | 2.78E-11 | 3.63E-09 | 0.00 |
| hsa-miR-93-3p   | 4.40 | 5.38  | 0.41 | Lower | 1.71E-05 | 7.69E-05 | 0.01 |
| hsa-miR-30c-5p  | 9.58 | 10.67 | 0.41 | Lower | 2.13E-08 | 3.09E-07 | 0.01 |
| hsa-miR-5690    | 1.74 | 2.93  | 0.42 | Lower | 4.08E-07 | 3.58E-06 | 0.01 |
| hsa-miR-361-5p  | 4.88 | 5.79  | 0.42 | Lower | 9.59E-05 | 0.00034  | 0.01 |
| hsa-miR-3653-3p | 4.15 | 4.96  | 0.43 | Lower | 0.00085  | 0.00208  | 0.16 |
| hsa-miR-140-3p  | 9.86 | 11.05 | 0.44 | Lower | 1.25E-08 | 2.17E-07 | 0.01 |
| hsa-miR-339-5p  | 2.28 | 3.32  | 0.44 | Lower | 3.59E-05 | 0.00014  | 0.08 |
| hsa-miR-133b    | 1.62 | 2.62  | 0.44 | Lower | 0.00011  | 0.00036  | 0.08 |
| hsa-miR-148a-3p | 3.29 | 4.22  | 0.44 | Lower | 0.00107  | 0.00244  | 0.12 |
| hsa-miR-146a-5p | 2.71 | 3.79  | 0.44 | Lower | 2.29E-07 | 2.49E-06 | 0.01 |
| hsa-miR-744-5p  | 2.12 | 3.28  | 0.45 | Lower | 1.45E-07 | 1.65E-06 | 0.06 |
| hsa-miR-99a-5p  | 2.09 | 3.11  | 0.45 | Lower | 6.74E-05 | 0.00025  | 0.07 |
| hsa-miR-194-5p  | 6.94 | 7.54  | 0.47 | Lower | 0.00463  | 0.00801  | 0.08 |
| hsa-miR-1285-3p | 1.81 | 2.92  | 0.47 | Lower | 1.11E-09 | 3.61E-08 | 0.01 |
| hsa-miR-502-5p  | 2.37 | 3.50  | 0.48 | Lower | 2.33E-05 | 0.00010  | 0.09 |
| hsa-miR-550a-3p | 6.68 | 7.80  | 0.48 | Lower | 0.00014  | 0.00042  | 0.12 |
| hsa-miR-191-5p  | 2.63 | 3.78  | 0.48 | Lower | 2.65E-05 | 0.00011  | 0.07 |
| hsa-miR-16-2-3p | 3.65 | 4.59  | 0.50 | Lower | 0.00076  | 0.00188  | 0.14 |
| hsa-miR-125a-5p | 4.16 | 5.22  | 0.50 | Lower | 0.00022  | 0.00062  | 0.11 |

|                  |       |       |      |        |          |          |      |
|------------------|-------|-------|------|--------|----------|----------|------|
| hsa-miR-19a-3p   | 5.68  | 6.49  | 0.50 | Lower  | 0.03067  | 0.04472  | 0.28 |
| hsa-miR-30e-5p   | 5.31  | 6.33  | 0.50 | Lower  | 0.00034  | 0.00091  | 0.12 |
| hsa-miR-222-3p   | 3.06  | 3.85  | 0.51 | Lower  | 8.37E-05 | 0.00030  | 0.09 |
| hsa-miR-30d-5p   | 8.61  | 9.58  | 0.51 | Lower  | 0.00022  | 0.00061  | 0.13 |
| hsa-miR-27a-3p   | 3.35  | 4.15  | 0.51 | Lower  | 0.00256  | 0.00507  | 0.18 |
| hsa-miR-423-3p   | 2.40  | 3.11  | 0.51 | Lower  | 9.36E-07 | 6.11E-06 | 0.02 |
| hsa-miR-501-3p   | 3.35  | 4.25  | 0.52 | Lower  | 2.75E-05 | 0.00011  | 0.06 |
| hsa-miR-324-5p   | 5.45  | 6.49  | 0.52 | Lower  | 0.00044  | 0.00112  | 0.13 |
| hsa-miR-3200-3p  | 1.72  | 2.75  | 0.53 | Lower  | 8.97E-07 | 6.11E-06 | 0.04 |
| hsa-miR-532-3p   | 7.76  | 8.36  | 0.53 | Lower  | 0.00054  | 0.00139  | 0.11 |
| hsa-miR-192-5p   | 8.76  | 9.17  | 0.54 | Lower  | 0.02262  | 0.03452  | 0.19 |
| hsa-miR-1271-5p  | 1.75  | 2.56  | 0.54 | Lower  | 1.41E-05 | 6.45E-05 | 0.07 |
| hsa-miR-296-5p   | 2.46  | 3.21  | 0.54 | Lower  | 1.50E-06 | 8.90E-06 | 0.01 |
| hsa-miR-151a-3p  | 6.32  | 7.14  | 0.54 | Lower  | 0.00099  | 0.00232  | 0.14 |
| hsa-miR-28-5p    | 3.22  | 4.01  | 0.54 | Lower  | 0.00036  | 0.00095  | 0.13 |
| hsa-miR-223-3p   | 12.78 | 13.69 | 0.56 | Lower  | 0.00175  | 0.00378  | 0.15 |
| hsa-miR-500a-3p  | 4.96  | 5.74  | 0.57 | Lower  | 0.00411  | 0.00730  | 0.14 |
| hsa-miR-142-5p   | 3.98  | 4.57  | 0.57 | Lower  | 0.00113  | 0.00257  | 0.16 |
| hsa-miR-501-5p   | 3.95  | 4.66  | 0.58 | Lower  | 0.00065  | 0.00163  | 0.10 |
| hsa-miR-4659a-3p | 1.71  | 2.60  | 0.59 | Lower  | 0.00015  | 0.00046  | 0.11 |
| hsa-miR-362-5p   | 5.36  | 6.21  | 0.60 | Lower  | 0.00214  | 0.00439  | 0.14 |
| hsa-miR-502-3p   | 5.28  | 5.98  | 0.60 | Lower  | 0.01365  | 0.02133  | 0.18 |
| hsa-miR-500a-5p  | 3.37  | 4.16  | 0.60 | Lower  | 0.00407  | 0.00727  | 0.15 |
| hsa-miR-331-3p   | 10.67 | 11.05 | 0.61 | Lower  | 0.01733  | 0.02677  | 0.20 |
| hsa-miR-484      | 8.52  | 9.17  | 0.61 | Lower  | 9.97E-05 | 0.00034  | 0.08 |
| hsa-miR-629-5p   | 3.01  | 3.64  | 0.62 | Lower  | 0.00195  | 0.00407  | 0.15 |
| hsa-miR-625-5p   | 5.19  | 5.61  | 0.62 | Lower  | 0.01016  | 0.01628  | 0.15 |
| hsa-miR-4323     | 3.32  | 3.86  | 0.64 | Lower  | 0.00238  | 0.00482  | 0.20 |
| hsa-miR-151a-5p  | 8.99  | 9.36  | 0.65 | Lower  | 0.00559  | 0.00935  | 0.21 |
| hsa-miR-29b-3p   | 3.37  | 3.90  | 0.65 | Lower  | 0.02921  | 0.04283  | 0.22 |
| hsa-let-7d-3p    | 1.56  | 2.12  | 0.67 | Lower  | 0.00014  | 0.00043  | 0.03 |
| hsa-miR-454-3p   | 2.22  | 2.79  | 0.68 | Lower  | 0.03089  | 0.04479  | 0.23 |
| hsa-miR-29a-3p   | 6.22  | 6.86  | 0.68 | Lower  | 0.00682  | 0.01126  | 0.18 |
| hsa-miR-664b-3p  | 4.62  | 5.25  | 0.68 | Lower  | 0.00037  | 0.00097  | 0.12 |
| hsa-miR-328-3p   | 2.96  | 3.39  | 0.70 | Lower  | 0.00368  | 0.00670  | 0.17 |
| hsa-miR-6803-3p  | 2.02  | 2.42  | 0.70 | Lower  | 0.00125  | 0.00274  | 0.11 |
| hsa-miR-151b     | 8.24  | 8.65  | 0.72 | Lower  | 0.02763  | 0.04121  | 0.24 |
| hsa-miR-132-3p   | 3.47  | 3.82  | 0.72 | Lower  | 0.02757  | 0.04121  | 0.26 |
| hsa-miR-342-3p   | 8.80  | 9.27  | 0.72 | Lower  | 0.00121  | 0.00269  | 0.16 |
| hsa-miR-6511b-3p | 1.84  | 2.22  | 0.74 | Lower  | 0.00316  | 0.00606  | 0.10 |
| hsa-miR-425-5p   | 11.47 | 11.62 | 0.82 | Lower  | 0.00369  | 0.00670  | 0.19 |
| hsa-miR-5739     | 6.01  | 4.48  | 3.71 | Higher | 6.28E-07 | 4.68E-06 | 0.99 |

|                 |       |       |      |        |          |          |      |
|-----------------|-------|-------|------|--------|----------|----------|------|
| hsa-miR-638     | 4.77  | 3.31  | 3.04 | Higher | 1.99E-08 | 3.05E-07 | 1.00 |
| hsa-miR-4459    | 6.84  | 5.55  | 2.92 | Higher | 7.22E-07 | 5.09E-06 | 0.96 |
| hsa-miR-6089    | 8.00  | 6.68  | 2.90 | Higher | 1.60E-09 | 4.63E-08 | 1.00 |
| hsa-miR-6165    | 4.76  | 3.51  | 2.86 | Higher | 2.86E-07 | 2.76E-06 | 0.97 |
| hsa-miR-6749-5p | 5.18  | 4.01  | 2.77 | Higher | 5.58E-06 | 2.70E-05 | 0.98 |
| hsa-miR-6085    | 4.95  | 3.47  | 2.73 | Higher | 6.58E-05 | 0.00025  | 0.90 |
| hsa-miR-3162-5p | 5.49  | 4.22  | 2.65 | Higher | 9.67E-08 | 1.24E-06 | 0.99 |
| hsa-miR-7977    | 11.10 | 9.75  | 2.55 | Higher | 0.00769  | 0.01260  | 0.82 |
| hsa-miR-4728-5p | 4.65  | 3.41  | 2.44 | Higher | 0.00027  | 0.00075  | 0.90 |
| hsa-miR-3656    | 4.77  | 3.43  | 2.42 | Higher | 5.31E-05 | 0.00020  | 0.87 |
| hsa-miR-4800-5p | 3.91  | 2.14  | 2.39 | Higher | 0.00091  | 0.00219  | 0.85 |
| hsa-miR-6087    | 6.56  | 5.40  | 2.38 | Higher | 9.96E-08 | 1.24E-06 | 1.00 |
| hsa-miR-7107-5p | 3.59  | 1.99  | 2.34 | Higher | 0.00028  | 0.00076  | 0.87 |
| hsa-miR-6125    | 5.56  | 4.30  | 2.28 | Higher | 1.97E-08 | 3.05E-07 | 0.99 |
| hsa-miR-7114-5p | 4.17  | 3.10  | 2.25 | Higher | 0.00042  | 0.00109  | 0.88 |
| hsa-miR-4286    | 7.54  | 6.49  | 2.20 | Higher | 0.00856  | 0.01379  | 0.80 |
| hsa-miR-6869-5p | 5.48  | 4.28  | 2.19 | Higher | 3.20E-07 | 2.98E-06 | 0.97 |
| hsa-miR-4505    | 5.90  | 4.71  | 2.16 | Higher | 3.48E-06 | 1.82E-05 | 0.93 |
| hsa-miR-210-3p  | 7.23  | 6.11  | 2.16 | Higher | 0.00019  | 0.00056  | 0.90 |
| hsa-miR-1202    | 4.63  | 3.60  | 2.14 | Higher | 2.71E-07 | 2.76E-06 | 0.98 |
| hsa-let-7b-5p   | 11.47 | 10.25 | 2.12 | Higher | 6.51E-07 | 4.72E-06 | 0.95 |
| hsa-miR-6740-5p | 5.84  | 5.02  | 2.09 | Higher | 5.10E-07 | 4.04E-06 | 1.00 |
| hsa-miR-2861    | 4.41  | 3.26  | 2.06 | Higher | 2.82E-07 | 2.76E-06 | 0.99 |
| hsa-miR-7704    | 4.65  | 3.41  | 2.05 | Higher | 1.08E-06 | 6.90E-06 | 0.94 |
| hsa-miR-1268b   | 4.20  | 3.31  | 2.05 | Higher | 4.92E-05 | 0.00019  | 0.92 |
| hsa-miR-4507    | 5.37  | 4.41  | 2.02 | Higher | 0.00093  | 0.00224  | 0.86 |
| hsa-miR-939-5p  | 3.95  | 2.92  | 1.96 | Higher | 1.78E-05 | 7.87E-05 | 0.92 |
| hsa-let-7i-5p   | 9.42  | 8.36  | 1.95 | Higher | 0.00242  | 0.00486  | 0.82 |
| hsa-miR-6124    | 4.75  | 4.01  | 1.95 | Higher | 2.06E-06 | 1.17E-05 | 1.00 |
| hsa-miR-6879-5p | 6.11  | 5.31  | 1.95 | Higher | 3.36E-05 | 0.00014  | 0.95 |
| hsa-miR-6803-5p | 6.16  | 4.96  | 1.95 | Higher | 0.00120  | 0.00269  | 0.83 |
| hsa-miR-4713-3p | 5.45  | 4.80  | 1.91 | Higher | 0.00013  | 0.00041  | 0.92 |
| hsa-miR-4530    | 5.07  | 4.11  | 1.88 | Higher | 3.45E-06 | 1.82E-05 | 0.96 |
| hsa-miR-4721    | 3.28  | 2.58  | 1.88 | Higher | 9.72E-05 | 0.00034  | 0.90 |
| hsa-miR-8069    | 10.98 | 10.02 | 1.87 | Higher | 0.00487  | 0.00836  | 0.80 |
| hsa-miR-6891-5p | 3.01  | 2.03  | 1.82 | Higher | 5.26E-08 | 7.23E-07 | 0.95 |
| hsa-miR-7110-5p | 3.04  | 2.06  | 1.81 | Higher | 0.01273  | 0.02002  | 0.80 |
| hsa-miR-3665    | 4.10  | 3.21  | 1.80 | Higher | 1.80E-06 | 1.04E-05 | 0.94 |
| hsa-miR-5001-5p | 2.68  | 1.93  | 1.79 | Higher | 9.35E-07 | 6.11E-06 | 0.94 |
| hsa-miR-6875-5p | 7.63  | 7.08  | 1.79 | Higher | 0.00256  | 0.00507  | 0.81 |
| hsa-miR-4669    | 2.90  | 1.89  | 1.75 | Higher | 0.00022  | 0.00061  | 0.88 |
| hsa-miR-1268a   | 3.55  | 2.60  | 1.74 | Higher | 0.00370  | 0.00670  | 0.86 |

|                  |       |       |      |        |          |          |      |
|------------------|-------|-------|------|--------|----------|----------|------|
| hsa-miR-6780b-5p | 5.75  | 5.25  | 1.72 | Higher | 0.00580  | 0.00964  | 0.80 |
| hsa-miR-16-5p    | 11.85 | 10.91 | 1.71 | Higher | 0.02001  | 0.03072  | 0.76 |
| hsa-miR-3198     | 4.80  | 4.18  | 1.70 | Higher | 0.00183  | 0.00387  | 0.88 |
| hsa-miR-4716-3p  | 4.13  | 3.44  | 1.70 | Higher | 0.00123  | 0.00273  | 0.91 |
| hsa-miR-4787-5p  | 2.92  | 2.17  | 1.70 | Higher | 1.27E-06 | 7.91E-06 | 0.93 |
| hsa-miR-7975     | 14.37 | 14.37 | 1.70 | Higher | 0.01491  | 0.02316  | 0.73 |
| hsa-miR-6807-5p  | 3.23  | 2.60  | 1.68 | Higher | 0.00011  | 0.00036  | 0.89 |
| hsa-miR-5194     | 3.71  | 3.20  | 1.68 | Higher | 0.00360  | 0.00667  | 0.87 |
| hsa-miR-6734-5p  | 4.38  | 3.76  | 1.67 | Higher | 0.00226  | 0.00461  | 0.89 |
| hsa-miR-564      | 3.15  | 2.26  | 1.67 | Higher | 0.00318  | 0.00606  | 0.83 |
| hsa-miR-6717-5p  | 5.20  | 4.73  | 1.66 | Higher | 0.00438  | 0.00767  | 0.87 |
| hsa-miR-6131     | 5.06  | 4.46  | 1.66 | Higher | 0.00285  | 0.00554  | 0.85 |
| hsa-miR-320b     | 9.53  | 9.12  | 1.66 | Higher | 0.00100  | 0.00232  | 0.83 |
| hsa-miR-197-5p   | 6.07  | 5.28  | 1.65 | Higher | 8.41E-05 | 0.00030  | 0.92 |
| hsa-miR-6769b-5p | 2.94  | 1.92  | 1.64 | Higher | 0.00326  | 0.00616  | 0.78 |
| hsa-miR-1305     | 4.52  | 3.98  | 1.64 | Higher | 0.00551  | 0.00929  | 0.87 |
| hsa-miR-6724-5p  | 3.01  | 2.15  | 1.63 | Higher | 0.00011  | 0.00036  | 0.88 |
| hsa-miR-3195     | 3.93  | 3.25  | 1.63 | Higher | 0.02559  | 0.03861  | 0.80 |
| hsa-miR-4687-3p  | 3.87  | 3.19  | 1.63 | Higher | 6.95E-10 | 2.59E-08 | 0.99 |
| hsa-miR-1587     | 3.30  | 2.62  | 1.63 | Higher | 0.00182  | 0.00387  | 0.80 |
| hsa-miR-4299     | 6.78  | 5.83  | 1.62 | Higher | 0.02558  | 0.03861  | 0.75 |
| hsa-miR-5581-5p  | 4.12  | 3.48  | 1.62 | Higher | 0.00537  | 0.00910  | 0.89 |
| hsa-miR-6127     | 7.87  | 7.27  | 1.60 | Higher | 0.00350  | 0.00653  | 0.80 |
| hsa-miR-6767-5p  | 3.95  | 3.33  | 1.60 | Higher | 0.00184  | 0.00388  | 0.89 |
| hsa-miR-4442     | 4.82  | 4.20  | 1.57 | Higher | 0.00016  | 0.00047  | 0.91 |
| hsa-miR-4281     | 6.03  | 5.17  | 1.57 | Higher | 0.00097  | 0.00230  | 0.87 |
| hsa-miR-3679-5p  | 3.43  | 2.72  | 1.57 | Higher | 0.00020  | 0.00058  | 0.88 |
| hsa-miR-5088-5p  | 3.42  | 3.01  | 1.56 | Higher | 0.00338  | 0.00634  | 0.86 |
| hsa-miR-1915-3p  | 3.41  | 2.76  | 1.53 | Higher | 0.00013  | 0.00041  | 0.89 |
| hsa-miR-320d     | 9.70  | 9.36  | 1.51 | Higher | 0.00429  | 0.00756  | 0.77 |
| hsa-miR-7847-3p  | 3.73  | 3.08  | 1.50 | Higher | 0.00157  | 0.00341  | 0.85 |
| hsa-miR-6893-5p  | 2.74  | 2.09  | 1.50 | Higher | 0.00380  | 0.00683  | 0.83 |
| hsa-miR-1914-3p  | 4.37  | 3.83  | 1.49 | Higher | 0.00528  | 0.00901  | 0.85 |
| hsa-miR-1207-5p  | 4.32  | 3.79  | 1.47 | Higher | 0.00058  | 0.00148  | 0.86 |
| hsa-miR-7152-3p  | 4.00  | 3.61  | 1.47 | Higher | 0.02842  | 0.04190  | 0.79 |
| hsa-miR-320a     | 8.71  | 8.29  | 1.46 | Higher | 0.00299  | 0.00578  | 0.81 |
| hsa-miR-4497     | 3.12  | 2.41  | 1.42 | Higher | 0.00854  | 0.01379  | 0.80 |
| hsa-miR-4788     | 6.84  | 6.11  | 1.41 | Higher | 0.01100  | 0.01740  | 0.77 |
| hsa-miR-6088     | 4.31  | 3.83  | 1.41 | Higher | 1.33E-07 | 1.57E-06 | 0.96 |
| hsa-miR-320c     | 9.05  | 8.61  | 1.41 | Higher | 0.00259  | 0.00509  | 0.81 |
| hsa-miR-4653-3p  | 3.81  | 3.41  | 1.38 | Higher | 0.02830  | 0.04190  | 0.80 |
| hsa-miR-4672     | 3.16  | 2.48  | 1.37 | Higher | 0.00773  | 0.01260  | 0.81 |

|                 |      |      |      |        |          |         |      |
|-----------------|------|------|------|--------|----------|---------|------|
| hsa-miR-4466    | 3.77 | 3.25 | 1.37 | Higher | 9.78E-05 | 0.00034 | 0.89 |
| hsa-miR-6090    | 5.88 | 5.31 | 1.36 | Higher | 0.00210  | 0.00435 | 0.79 |
| hsa-miR-320e    | 9.23 | 8.99 | 1.36 | Higher | 0.01077  | 0.01714 | 0.77 |
| hsa-miR-1225-5p | 4.54 | 4.13 | 1.35 | Higher | 0.00017  | 0.00050 | 0.86 |
| hsa-miR-3960    | 6.82 | 6.53 | 1.29 | Higher | 0.03130  | 0.04513 | 0.70 |
| hsa-miR-6800-5p | 3.78 | 3.41 | 1.24 | Higher | 0.00458  | 0.00797 | 0.86 |

- Un-paired two-tailed t test was used to calculate the *P*-value.
- Benjamini-Hochberg False Discovery Rate (FDR) correction was used to adjust the *P*-value.
- Significant changes in abundance levels are shown with an adjusted *P*-value <0.05
- AUC, Area under the curve

**SUPPLEMENTARY TABLE 3:** Significantly abundant transcripts in the blood of patients with Ebstein's anomaly compared to healthy controls as determined by microarray.

| Human Symbol                                                          | Gene ID | Median<br>Ebstein's<br>anomaly | Median<br>Controls | Fold<br>change | Regulation | <i>P</i> -value | Adjusted<br><i>P</i> -value | AUC  |
|-----------------------------------------------------------------------|---------|--------------------------------|--------------------|----------------|------------|-----------------|-----------------------------|------|
| KANK4 (KN motif and ankyrin repeat domains 4)                         | 163782  | 7.59                           | 6.45               | 2.71           | Higher     | 6.07E-05        | 0.0400                      | 0.92 |
| ADGRE4P (adhesion G protein-coupled receptor E4, pseudogene)          | 326342  | 5.10                           | 3.58               | 2.53           | Higher     | 4.81E-05        | 0.0383                      | 0.89 |
| KCNG1 (potassium voltage-gated channel modifier subfamily G member 1) | 3755    | 6.41                           | 5.22               | 2.48           | Higher     | 4.07E-05        | 0.0383                      | 0.88 |
| IGF2R (insulin like growth factor 2 receptor)                         | 3482    | 10.29                          | 9.49               | 2.06           | Higher     | 6.59E-05        | 0.0404                      | 0.91 |
| BAZ2A (bromodomain adjacent to zinc finger domain 2A)                 | 11176   | 8.68                           | 7.70               | 1.95           | Higher     | 1.45E-06        | 0.0082                      | 0.95 |
| BACE2 (beta-secretase 2)                                              | 25825   | 8.92                           | 8.11               | 1.91           | Higher     | 5.80E-05        | 0.0400                      | 0.90 |
| PGD (phosphogluconate dehydrogenase)                                  | 5226    | 11.50                          | 10.55              | 1.83           | Higher     | 6.82E-05        | 0.0404                      | 0.88 |
| KDM1A (lysine demethylase 1A)                                         | 23028   | 5.86                           | 5.12               | 1.82           | Higher     | 4.82E-07        | 0.0065                      | 0.97 |
| RIOK1 (RIO kinase 1)                                                  | 83732   | 7.42                           | 6.75               | 1.81           | Higher     | 5.43E-06        | 0.0161                      | 0.97 |
| PRPF38B (pre-mRNA processing factor 38B)                              | 55119   | 7.36                           | 6.60               | 1.73           | Higher     | 3.38E-05        | 0.0383                      | 0.89 |
| ITGAM (integrin subunit alpha M)                                      | 3684    | 10.80                          | 9.92               | 1.72           | Higher     | 4.65E-05        | 0.0383                      | 0.88 |
| CCNY (cyclin Y)                                                       | 219771  | 9.65                           | 8.84               | 1.68           | Higher     | 3.68E-05        | 0.0383                      | 0.90 |
| ZFP91 (ZFP91 zinc finger protein, atypical E3 ubiquitin ligase)       | 80829   | 8.40                           | 7.64               | 1.68           | Higher     | 7.49E-06        | 0.0169                      | 0.92 |
| ARID1A (AT-rich interaction domain 1A)                                | 8289    | 8.19                           | 7.52               | 1.66           | Higher     | 0.0001          | 0.0457                      | 0.90 |
| LASP1 (LIM and SH3 protein 1)                                         | 3927    | 11.34                          | 10.78              | 1.59           | Higher     | 3.42E-07        | 0.0065                      | 0.95 |
| VPS35 (VPS35 retromer complex component)                              | 55737   | 9.87                           | 9.24               | 1.59           | Higher     | 1.52E-06        | 0.0082                      | 0.96 |
| PAK1 (p21 (RAC1) activated kinase 1)                                  | 5058    | 11.68                          | 11.15              | 1.55           | Higher     | 4.00E-05        | 0.0383                      | 0.92 |
| RBM23 (RNA binding motif protein 23)                                  | 55147   | 8.40                           | 7.81               | 1.54           | Higher     | 6.04E-05        | 0.0400                      | 0.90 |
| CUX1 (cut like homeobox 1)                                            | 1523    | 8.89                           | 8.29               | 1.53           | Higher     | 0.0001          | 0.0457                      | 0.87 |
| WDR1 (WD repeat domain 1)                                             | 9948    | 9.08                           | 8.58               | 1.52           | Higher     | 2.34E-06        | 0.0090                      | 0.95 |

|                                                                 |           |       |       |      |        |          |        |      |
|-----------------------------------------------------------------|-----------|-------|-------|------|--------|----------|--------|------|
| CACUL1 (CDK2 associated cullin domain 1)                        | 143384    | 8.47  | 7.87  | 1.52 | Higher | 1.24E-05 | 0.0224 | 0.90 |
| CHD4 (chromodomain helicase DNA binding protein 4)              | 1108      | 9.15  | 8.68  | 1.51 | Higher | 5.41E-05 | 0.0400 | 0.90 |
| PSME3 (proteasome activator subunit 3)                          | 10197     | 9.16  | 8.57  | 1.51 | Higher | 3.09E-05 | 0.0383 | 0.92 |
| VPS26B (VPS26, retromer complex component B)                    | 112936    | 9.30  | 8.78  | 1.51 | Higher | 9.21E-06 | 0.0191 | 0.95 |
| IL17RA (interleukin 17 receptor A)                              | 23765     | 11.95 | 11.50 | 1.50 | Higher | 3.84E-05 | 0.0383 | 0.90 |
| RNF130 (ring finger protein 130)                                | 55819     | 11.45 | 10.83 | 1.49 | Higher | 2.24E-06 | 0.0090 | 0.94 |
| ATG9B (autophagy related 9B)                                    | 285973    | 3.87  | 3.34  | 1.47 | Higher | 6.23E-06 | 0.0161 | 0.93 |
| PSAP (prosaposin)                                               | 5660      | 12.44 | 11.89 | 1.45 | Higher | 8.62E-05 | 0.0418 | 0.87 |
| PTK2B (protein tyrosine kinase 2 beta)                          | 2185      | 12.47 | 11.81 | 1.44 | Higher | 0.0001   | 0.0472 | 0.90 |
| FOXP3 (forkhead box N3)                                         | 1112      | 9.57  | 8.99  | 1.44 | Higher | 7.26E-05 | 0.0404 | 0.90 |
| CDH1 (cadherin 1)                                               | 999       | 3.67  | 3.07  | 1.44 | Higher | 8.07E-05 | 0.0411 | 0.86 |
| GPI (glucose-6-phosphate isomerase)                             | 2821      | 12.41 | 11.96 | 1.44 | Higher | 3.70E-05 | 0.0383 | 0.89 |
| THRAP3 (thyroid hormone receptor associated protein 3)          | 9967      | 11.08 | 10.56 | 1.43 | Higher | 4.39E-05 | 0.0383 | 0.88 |
| GNL2 (G protein nucleolar 2)                                    | 29889     | 8.41  | 7.97  | 1.43 | Higher | 7.18E-05 | 0.0404 | 0.90 |
| SH3KBP1 (SH3 domain containing kinase binding protein 1)        | 30011     | 11.10 | 10.44 | 1.42 | Higher | 5.30E-06 | 0.0161 | 0.91 |
| PWP1 (PWP1 homolog, endonuclease)                               | 11137     | 10.60 | 10.01 | 1.41 | Higher | 8.67E-05 | 0.0418 | 0.88 |
| PRKCD (protein kinase C delta)                                  | 5580      | 11.20 | 10.76 | 1.40 | Higher | 5.86E-05 | 0.0400 | 0.88 |
| ZNF24 (zinc finger protein 24)                                  | 7572      | 9.78  | 9.20  | 1.40 | Higher | 6.45E-05 | 0.0404 | 0.88 |
| CERS2 (ceramide synthase 2)                                     | 29956     | 9.99  | 9.48  | 1.38 | Higher | 1.24E-05 | 0.0224 | 0.92 |
| DGKD (diacylglycerol kinase delta)                              | 8527      | 10.94 | 10.48 | 1.36 | Higher | 0.0001   | 0.0464 | 0.87 |
| MKLN1-AS (MKLN1 antisense RNA)                                  | 100506881 | 3.73  | 3.32  | 1.34 | Higher | 7.85E-05 | 0.0408 | 0.88 |
| KPNA6 (karyopherin subunit alpha 6)                             | 23633     | 10.21 | 9.74  | 1.33 | Higher | 5.62E-05 | 0.0400 | 0.89 |
| DHX16 (DEAH-box helicase 16)                                    | 8449      | 9.52  | 9.01  | 1.30 | Higher | 3.10E-05 | 0.0383 | 0.90 |
| HDAC6 (histone deacetylase 6)                                   | 10013     | 8.72  | 8.45  | 1.26 | Higher | 4.22E-05 | 0.0383 | 0.90 |
| GEMIN7 (gem nuclear organelle associated protein 7)             | 79760     | 8.79  | 9.26  | 0.73 | Lower  | 3.94E-05 | 0.0383 | 0.10 |
| ABCC6 (ATP binding cassette subfamily C member 6)               | 368       | 4.99  | 5.56  | 0.70 | Lower  | 4.26E-05 | 0.0383 | 0.12 |
| CREB3L4 (cAMP responsive element binding protein 3 like 4)      | 148327    | 7.55  | 8.17  | 0.68 | Lower  | 7.20E-05 | 0.0404 | 0.13 |
| LCN8 (lipocalin 8)                                              | 138307    | 4.35  | 4.98  | 0.60 | Lower  | 7.54E-05 | 0.0404 | 0.07 |
| PRKAA2 (protein kinase AMP-activated catalytic subunit alpha 2) | 5563      | 4.04  | 4.67  | 0.59 | Lower  | 7.44E-05 | 0.0404 | 0.04 |
| SLC9A4 (solute carrier family 9 member A4)                      | 389015    | 8.48  | 9.15  | 0.59 | Lower  | 2.44E-05 | 0.0383 | 0.03 |
| SCRN3 (secernin 3)                                              | 79634     | 5.19  | 6.43  | 0.44 | Lower  | 5.25E-05 | 0.0400 | 0.11 |

- Un-paired two-tailed t test was used to calculate the *P*-value.
- Benjamini-Hochberg False Discovery Rate (FDR) correction was used to adjust the *P*-value.
- Significant changes in abundance levels are shown with an adjusted *P*-value <0.05
- AUC, Area under the curve

**SUPPLEMENTARY TABLE 4:** Significant inverse correlation between the identified miRNA and their potential target mRNAs.

| mRNA                                                   | miRNA           | Ebstein's<br>anomaly<br>Correlation | Ebstein's anomaly<br>Correlation P-<br>value | Controls<br>Correlation | Controls<br>Correlation<br>P-value | Difference |
|--------------------------------------------------------|-----------------|-------------------------------------|----------------------------------------------|-------------------------|------------------------------------|------------|
| CACUL1 (CDK2 associated cullin domain 1)               | hsa-miR-23a-3p  | 0.48                                | 0.0688                                       | -0.39                   | 0.1931                             | -0.87      |
| CCNY (cyclin Y)                                        | hsa-miR-30e-3p  | 0.63                                | 0.0126                                       | 0.08                    | 0.8065                             | -0.55      |
| CDH1 (cadherin 1)                                      | hsa-miR-340-3p  | 0.72                                | 0.0033                                       | -0.05                   | 0.8775                             | -0.77      |
| CDH1 (cadherin 1)                                      | hsa-miR-326     | 0.46                                | 0.0834                                       | -0.18                   | 0.5461                             | -0.65      |
| CDH1 (cadherin 1)                                      | hsa-miR-23b-3p  | 0.44                                | 0.1043                                       | -0.21                   | 0.4924                             | -0.65      |
| CDH1 (cadherin 1)                                      | hsa-miR-142-3p  | 0.59                                | 0.0232                                       | 0.05                    | 0.8653                             | -0.54      |
| CDH1 (cadherin 1)                                      | hsa-miR-361-3p  | 0.61                                | 0.0151                                       | 0.09                    | 0.7665                             | -0.52      |
| CDH1 (cadherin 1)                                      | hsa-miR-505-3p  | 0.53                                | 0.0438                                       | 0.01                    | 0.9644                             | -0.52      |
| CERS2 (ceramide synthase 2)                            | hsa-miR-340-3p  | 0.69                                | 0.0044                                       | -0.10                   | 0.7370                             | -0.79      |
| CHD4 (chromodomain helicase DNA binding protein 4)     | hsa-miR-361-5p  | -0.43                               | 0.1070                                       | 0.32                    | 0.2872                             | 0.75       |
| DGKD (diacylglycerol kinase delta)                     | hsa-miR-23a-3p  | 0.80                                | 0.0004                                       | -0.12                   | 0.6932                             | -0.92      |
| DGKD (diacylglycerol kinase delta)                     | hsa-miR-942-5p  | 0.54                                | 0.0386                                       | -0.30                   | 0.3242                             | -0.84      |
| DGKD (diacylglycerol kinase delta)                     | hsa-miR-30c-5p  | 0.48                                | 0.0725                                       | -0.35                   | 0.2342                             | -0.83      |
| DGKD (diacylglycerol kinase delta)                     | hsa-miR-30b-5p  | 0.86                                | 0.0001                                       | 0.07                    | 0.8201                             | -0.79      |
| DGKD (diacylglycerol kinase delta)                     | hsa-miR-505-3p  | 0.59                                | 0.0232                                       | -0.15                   | 0.6217                             | -0.74      |
| DGKD (diacylglycerol kinase delta)                     | hsa-miR-361-3p  | 0.73                                | 0.0021                                       | 0.11                    | 0.7322                             | -0.62      |
| DGKD (diacylglycerol kinase delta)                     | hsa-miR-199a-5p | 0.76                                | 0.0010                                       | 0.14                    | 0.6536                             | -0.62      |
| GPI (glucose-6-phosphate isomerase)                    | hsa-miR-339-5p  | -0.70                               | 0.0036                                       | 0.09                    | 0.7818                             | 0.79       |
| THRAP3 (thyroid hormone receptor associated protein 3) | hsa-miR-23a-3p  | 0.63                                | 0.0117                                       | -0.33                   | 0.2699                             | -0.96      |
| THRAP3 (thyroid hormone receptor associated protein 3) | hsa-miR-199a-5p | 0.58                                | 0.0221                                       | -0.31                   | 0.2960                             | -0.90      |
| THRAP3 (thyroid hormone receptor associated protein 3) | hsa-miR-340-3p  | 0.60                                | 0.0195                                       | 0.04                    | 0.8918                             | -0.56      |
| ITGAM (integrin subunit alpha M)                       | hsa-miR-23b-3p  | 0.59                                | 0.0201                                       | -0.60                   | 0.0290                             | -1.20      |
| ITGAM (integrin subunit alpha M)                       | hsa-miR-23a-3p  | 0.39                                | 0.1499                                       | -0.48                   | 0.0997                             | -0.87      |

|                                              |                 |       |        |       |        |       |
|----------------------------------------------|-----------------|-------|--------|-------|--------|-------|
| ITGAM (integrin subunit alpha M)             | hsa-miR-140-3p  | 0.52  | 0.0479 | -0.22 | 0.4639 | -0.74 |
| KPNA6 (karyopherin subunit alpha 6)          | hsa-miR-125a-5p | 0.75  | 0.0019 | -0.04 | 0.9062 | -0.79 |
| PTK2B (protein tyrosine kinase 2 beta)       | hsa-miR-23a-3p  | 0.49  | 0.0620 | -0.43 | 0.1456 | -0.92 |
| PTK2B (protein tyrosine kinase 2 beta)       | hsa-miR-23b-3p  | 0.43  | 0.1125 | -0.47 | 0.1019 | -0.90 |
| PTK2B (protein tyrosine kinase 2 beta)       | hsa-miR-7-1-3p  | 0.36  | 0.1870 | -0.53 | 0.0642 | -0.89 |
| PTK2B (protein tyrosine kinase 2 beta)       | hsa-miR-378a-5p | 0.37  | 0.1779 | -0.49 | 0.0915 | -0.85 |
| PTK2B (protein tyrosine kinase 2 beta)       | hsa-miR-340-3p  | 0.31  | 0.2535 | -0.48 | 0.1013 | -0.79 |
| RNF130 (ring finger protein 130)             | hsa-miR-140-3p  | 0.51  | 0.0536 | -0.31 | 0.3046 | -0.82 |
| RNF130 (ring finger protein 130)             | hsa-miR-23a-3p  | 0.55  | 0.0336 | -0.16 | 0.6021 | -0.71 |
| RNF130 (ring finger protein 130)             | hsa-miR-30b-5p  | 0.38  | 0.1596 | -0.14 | 0.6415 | -0.53 |
| VPS26B (VPS26, retromer complex component B) | hsa-miR-30b-5p  | 0.55  | 0.0343 | -0.63 | 0.0202 | -1.18 |
| VPS26B (VPS26, retromer complex component B) | hsa-miR-365a-3p | 0.60  | 0.0213 | -0.32 | 0.2872 | -0.92 |
| VPS26B (VPS26, retromer complex component B) | hsa-miR-340-3p  | 0.56  | 0.0336 | -0.22 | 0.4704 | -0.78 |
| SCRN3 (secernin 3)                           | has-let-7b-5p   | -0.28 | 0.3106 | 0.35  | 0.2378 | 0.63  |
